# Supplementary material
Source: PubMed Central journal article supplement (PMC8046596)
Supplement: NIHMS1687661-supplement-SI.pdf [file NIHMS1687661-supplement-SI.pdf]

## SUPPORTING INFORMATION

### **A Mechanistic Investigation of Methylene Blue and Heparin Interactions and Their Photoacoustic Enhancement**

Junxin Wang<sup>1†</sup>, Ananthakrishnan Soundaram Jeevarathinam<sup>1†</sup>, Kathryn Humphries<sup>2</sup>, Anamik Jhunjhunwala<sup>4</sup>, Fang Chen<sup>1,3</sup>, Ali Hariri<sup>1</sup>, Bill R. Miller III<sup>2</sup>, and Jesse V. Jokerst<sup>1,3,5\*</sup>

1 Department of NanoEngineering

3 Materials Science and Engineering Program

4 Department of BioEngineering

5 Department of Radiology

University of California, San Diego, 9500 Gilman Drive, La Jolla, CA 92093, USA

2 Department of Chemistry

Truman State University, 100 E Normal St, Kirksville, MO 63501, USA

<sup>†</sup>These authors contribute equally.

\* Correspondence and requests for materials should be addressed to [jjokerst@ucsd.edu](mailto:jjokerst@ucsd.edu).

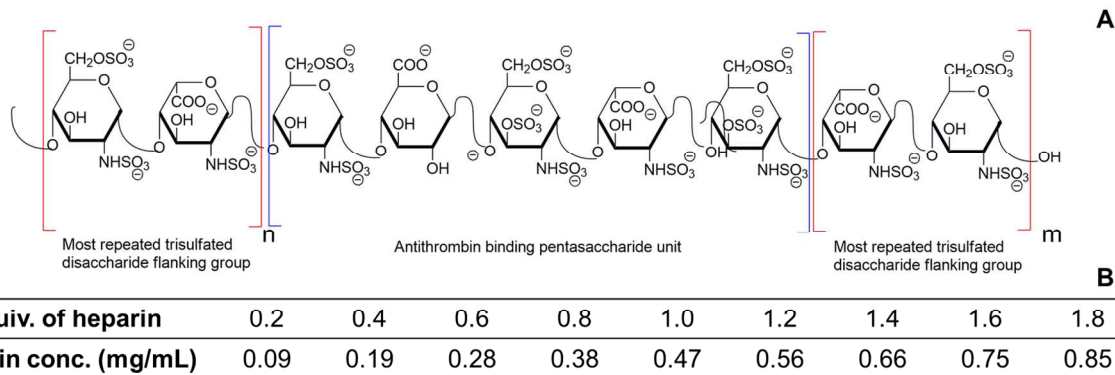

**Supplementary Figure S1:** Heparin chemical structure and estimated amount of heparin in MB-heparin mixture. Panel A shows the 3 subunits of heparin—an antithrombin binding pentasaccharide site, a flanking disulfated disaccharide, and the dominant repeated bridging trisulfated disaccharide units. Panel B shows the ratio between the estimated number of sulfate groups on heparin and concentration as a function of 0.90 mg/mL MB.

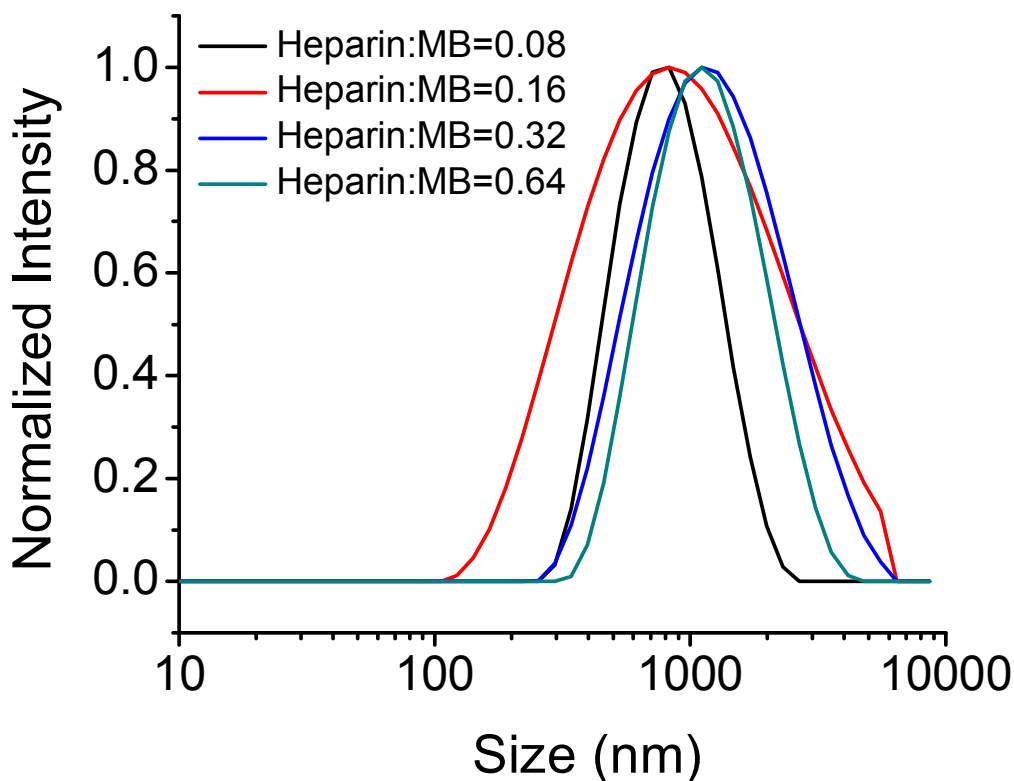

**Supplementary Figure S2:** Size measurement of the MB-heparin aggregates as a function of heparin concentration. Increasing heparin concentration from 0.03125 to 0.25 mg/mL in 0.2 mM MB increased the MB-heparin aggregate size from 870 nm (0.03125 mg/mL) to 1451 nm (0.125 mg/mL) and then decreased the size to 1279 nm (0.25 mg/mL).

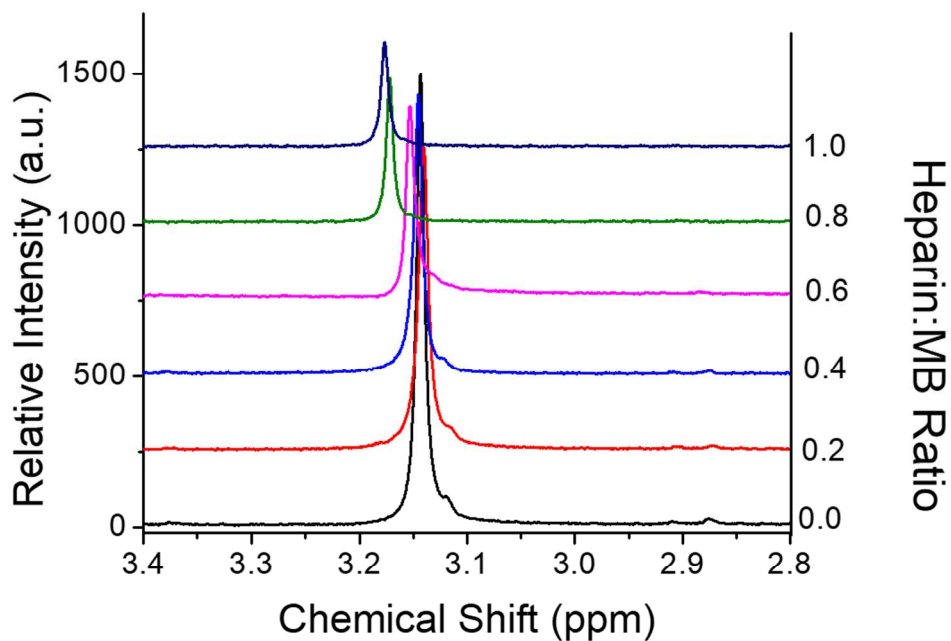

**Supplementary Figure S3:** NMR spectra of the dimethyl amino proton of the 0.9 mg/mL MB with increasing heparin concentration. The NMR intensity decreased 76% when the heparin:MB ratio increased from 0.0 to 1.0.

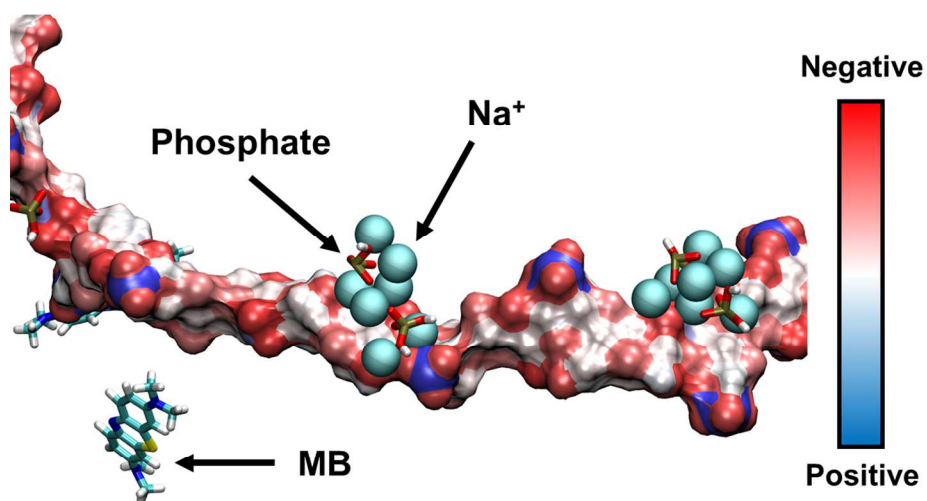

**Supplementary Figure S4:** PBS effect in MB-heparin binding. This figure depicts the interactions between the binding residues of heparin (shown as a surface, red to blue represents charge from positive to negative) and the PBS solvent system ( $\text{Na}^+$  ions shown in blue and phosphate ions shown in yellow and red), producing a competition for binding sites between PBS and MB.
